# Supplementary material for: Whole exome and transcriptome analysis revealed the activation of ERK and Akt signaling pathway in canine histiocytic sarcoma
Source: Springer Nature journal article supplement (doi:10.1038/s41598-023-35813-1), 2023-05-25
Supplement: MOESM5 [file 41598_2023_35813_MOESM5_ESM.pdf › 41598_2023_35813_MOESM5_ESM.pdf]

Table S1. Performance metrics in whole exome sequencing (WES) and RNA-seq.

| Sample  |   | WES             |                   |                  |                  |          | RNA-seq |                 |                  |                  |
|---------|---|-----------------|-------------------|------------------|------------------|----------|---------|-----------------|------------------|------------------|
|         |   | Total reads (M) | Trimmed reads (M) | Mapped reads (M) | Mapping rate (%) | Coverage | RIN     | Total reads (M) | Mapped reads (M) | Mapping rate (%) |
| Dog 1   | N | 193.5           | 185.4             | 184.2            | 99.3             | 427.6    | 9.3     | 62.8            | 60.0             | 95.6             |
|         | T | 178.1           | 170.0             | 167.7            | 99.6             | 396.2    |         |                 |                  |                  |
| Dog 2   | N | 199.0           | 190.9             | 189.8            | 99.4             | 440.1    | 8.2     | 37.7            | 31.1             | 82.5             |
|         | T | 175.3           | 168.2             | 167.0            | 99.3             | 387.9    |         |                 |                  |                  |
| Dog 3   | N | 199.2           | 191.0             | 184.9            | 99.2             | 440.7    | 9.6     | 43.5            | 36.2             | 83.4             |
|         | T | 195.1           | 186.6             | 184.9            | 99.1             | 431.6    |         |                 |                  |                  |
| Dog 4   | N | 119.8           | 92.0              | 91.4             | 99.4             | 318.1    | 8.7     | 42.5            | 34.9             | 82.1             |
|         | T | 111.5           | 85.3              | 84.7             | 99.3             | 295.1    |         |                 |                  |                  |
| Dog 5   | N | 133.3           | 98.7              | 97.9             | 99.2             | 341.5    | NE      | NE              | NE               | NE               |
|         | T | 65.8            | 76.0              | 75.2             | 99.0             | 262.7    |         |                 |                  |                  |
| PBMoC 1 |   | NE              | NE                | NE               | NE               | NE       | 8.8     | 102.7           | 92.7             | 90.3             |
| PBMoC 2 |   | NE              | NE                | NE               | NE               | NE       | 8.0     | 103.5           | 92.5             | 89.4             |
| PBMoC 3 |   | NE              | NE                | NE               | NE               | NE       | 9.0     | 109.6           | 98.2             | 89.6             |

N, normal cell sample; T, tumor cell sample; RIN, RNA integrity number; NE, not evaluated

Table S2. Normalized expression values of receptor tyrosine kinase genes in data of RNA-seq.

| Dog 1         |                             | Dog 2         |                             | Dog 3         |                             | Dog 4         |                             |
|---------------|-----------------------------|---------------|-----------------------------|---------------|-----------------------------|---------------|-----------------------------|
| Gene          | Normalized expression value | Gene          | Normalized expression value | Gene          | Normalized expression value | Gene          | Normalized expression value |
| <i>FGFR1</i>  | 121.6                       | <i>PDGFRB</i> | 137.4                       | <i>PDGFRB</i> | 59.0                        | <i>FGFR1</i>  | 18.7                        |
| <i>VEGFR1</i> | 39.5                        | <i>FGFR1</i>  | 128.5                       | <i>FGFR1</i>  | 18.5                        | <i>FLT3</i>   | 2.2                         |
| <i>PDGFRA</i> | 25.6                        | <i>ERBB2</i>  | 59.9                        | <i>VEGFR2</i> | 16.7                        | <i>PDGFRB</i> | 1.5                         |
| <i>ERBB2</i>  | 24.1                        | <i>NTRK3</i>  | 31.0                        | <i>VEGFR3</i> | 15.4                        | <i>ERBB2</i>  | 1.2                         |
| <i>ERBB1</i>  | 17.1                        | <i>VEGFR3</i> | 30.1                        | <i>ERBB2</i>  | 10.4                        | <i>VEGFR3</i> | 1.0                         |
| <i>PDGFRB</i> | 6.0                         | <i>VEGFR2</i> | 25.5                        | <i>ERBB1</i>  | 8.8                         | <i>ERBB3</i>  | 0.9                         |
| <i>FGFR3</i>  | 2.3                         | <i>ERBB1</i>  | 22.8                        | <i>VEGFR1</i> | 6.7                         | <i>FGFR3</i>  | 0.8                         |
| <i>FLT3</i>   | 1.0                         | <i>VEGFR1</i> | 16.4                        | <i>ERBB3</i>  | 6.0                         | <i>PDGFRA</i> | 0.3                         |
| <i>FGFR2</i>  | 0.7                         | <i>FGFR3</i>  | 15.7                        | <i>PDGFRA</i> | 5.6                         | <i>NTRK3</i>  | 0.0                         |
| <i>VEGFR3</i> | 0.4                         | <i>PDGFRA</i> | 13.5                        | <i>FLT3</i>   | 4.8                         | <i>RET</i>    | 0.0                         |
| <i>ERBB3</i>  | 0.4                         | <i>FGFR2</i>  | 9.0                         | <i>NTRK3</i>  | 2.4                         | <i>FGFR4</i>  | 0.0                         |
| <i>NTRK1</i>  | 0.2                         | <i>RET</i>    | 1.6                         | <i>FGFR3</i>  | 2.4                         | <i>VEGFR2</i> | 0.0                         |
| <i>NTRK3</i>  | 0.1                         | <i>FLT3</i>   | 1.3                         | <i>RET</i>    | 2.1                         | <i>ERBB1</i>  | 0.0                         |
| <i>RET</i>    | 0.1                         | <i>ERBB3</i>  | 1.2                         | <i>KIT</i>    | 1.7                         | <i>VEGFR1</i> | 0.0                         |
| <i>FGFR4</i>  | 0.1                         | <i>KIT</i>    | 1.1                         | <i>NTRK1</i>  | 1.3                         | <i>KIT</i>    | 0.0                         |
| <i>VEGFR2</i> | 0.0                         | <i>FGFR4</i>  | 0.9                         | <i>NTRK2</i>  | 1.3                         | <i>NTRK1</i>  | 0.0                         |
| <i>KIT</i>    | 0.0                         | <i>NTRK1</i>  | 0.8                         | <i>FGFR2</i>  | 0.2                         | <i>NTRK2</i>  | 0.0                         |
| <i>NTRK2</i>  | 0.0                         | <i>NTRK2</i>  | 0.0                         | <i>FGFR4</i>  | 0.0                         | <i>FGFR2</i>  | 0.0                         |

Table S3. Information of canine histiocytic sarcoma cases included in this study.

| Dog | Breed                 | Sex | Age (y) | Subtype | Lesion locations              | Obtained tumor cell samples | Sample type | Normal cell samples        | WES | RNA-seq | RT-qPCR | IHC | Cell line |
|-----|-----------------------|-----|---------|---------|-------------------------------|-----------------------------|-------------|----------------------------|-----|---------|---------|-----|-----------|
| 1   | Shiba                 | SF  | 12      | DHS     | Soft tissue and mandibular LN | Soft tissue mass            | Frozen/FFPE | PB                         | ○   | ○       | ○       | ○   | DHS-1     |
| 2   | Pomeranian            | M   | 12      | DHS     | Spleen and liver              | Liver mass                  | Frozen/FFPE | Normal region of the liver | ○   | ○       | ○       | ○   | -         |
| 3   | Flat-coated Retriever | M   | 8       | DHS     | Shoulder joint and skin       | Shoulder joint mass         | Frozen/FFPE | Normal skin                | ○   | ○       | ○       | ○   | -         |
| 4   | Miniature Schnauzer   | F   | 6       | LHS     | Lung                          | Pleural fluid               | Frozen      | PB                         | ○   | ○       | ○       | -   | DHS-2     |
| 5   | Flat-coated Retriever | F   | 11      | LHS     | Lung                          | Lung mass                   | Frozen/FFPE | PB                         | ○   | -       | -       | ○   | -         |
| 6   | Flat-coated Retriever | CM  | 8       | DHS     | Soft tissue, LN               | Soft tissue mass            | Frozen      | -                          | -   | -       | ○       | -   | -         |
| 7   | Bernese Mountain Dog  | CM  | 8       | DHS     | Lung (multiple lesions)       | Lung mass                   | Frozen      | -                          | -   | -       | ○       | -   | -         |
| 8   | Golden Retriever      | CM  | 13      | LHS     | Elbow joint                   | Elbow joint mass            | Frozen      | -                          | -   | -       | ○       | -   | -         |
| 9   | Beagle                | CM  | 9       | DHS     | Spleen and soft tissue        | Spleen                      | FFPE        | -                          | -   | -       | -       | ○   | -         |
| 10  | Flat-coated Retriever | SF  | 6       | DHS     | Lung, LN                      | Lung mass                   | FFPE        | -                          | -   | -       | -       | ○   | -         |
| 11  | Welsh Corgi Pembroke  | CM  | 8       | DHS     | Lung (multiple lesions)       | Lung mass                   | FFPE        | -                          | -   | -       | -       | ○   | -         |
| 12  | Rottweiler            | CM  | 9       | DHS     | Systemic organs               | Urinary bladder mass        | FFPE        | -                          | -   | -       | -       | ○   | -         |
| 13  | Flat-coated Retriever | CM  | 9       | DHS     | Liver, spleen, and LN         | LN                          | FFPE        | -                          | -   | -       | -       | ○   | -         |
| 14  | Welsh Corgi Pembroke  | M   | 11      | LHS     | Lung                          | Lung mass                   | FFPE        | -                          | -   | -       | -       | ○   | -         |
| 15  | Labrador Retriever    | SF  | 15      | LHS     | Soft tissue                   | Soft tissue mass            | FFPE        | -                          | -   | -       | -       | ○   | -         |
| 16  | Pointer               | SF  | 12      | DHS     | Spleen and lung               | Spleen                      | FFPE        | -                          | -   | -       | -       | ○   | -         |
| 17  | Welsh Corgi Pembroke  | CM  | 12      | DHS     | Lung (multiple lesions)       | Lung mass                   | FFPE        | -                          | -   | -       | -       | ○   | -         |
| 18  | Beagle                | CM  | 6       | -       | -                             | -                           | PB          | PB                         | -   | ○       | ○       | -   | -         |
| 19  | Beagle                | CM  | 7       | -       | -                             | -                           | PB          | PB                         | -   | -       | ○       | -   | -         |
| 20  | Beagle                | CM  | 7       | -       | -                             | -                           | PB          | PB                         | -   | -       | ○       | -   | -         |

M, male; CM, castrated male; F, female; SF, spayed female; DHS, disseminated histiocytic sarcoma; LHS, localized histiocytic sarcoma;

LN, lymph node; FFPE, formalin-fixed paraffin-embedded; PB, peripheral blood; WES, whole exome sequencing; RNA-seq, RNA-sequencing; IHC, immunohistochemistry

Table S4. IC<sub>50</sub> values of cell lines against ponatinib.

|                       | CHS1 | CHS2 | CHS3 | CHS4 | CHS5 | CHS6 | CHS7 | CHS8 | MHT2 | DH82 | DHS1 | DHS2 | MDCK |
|-----------------------|------|------|------|------|------|------|------|------|------|------|------|------|------|
| IC <sub>50</sub> (nM) | 1090 | 490  | 454  | 321  | 659  | 132  | 462  | 944  | 779  | 1350 | 2200 | 90.4 | -    |

Table S5. Antibodies used in this study.

| Target              | Manufacturer            | Host and clonality | clone     | Catalog no. | RRID        | Dilution |         |
|---------------------|-------------------------|--------------------|-----------|-------------|-------------|----------|---------|
|                     |                         |                    |           |             |             | WB       | IHC     |
| CD14                | Abcam                   | Rabbit mAb         | Tuk4      | ab27545     | AB_2857907  | -        | -       |
| FGFR1               | Abcam                   | Rabbit pAb         | -         | ab10646     | AB_297367   | -        | 1:1,500 |
| ERK1/2              | CST                     | Rabbit mAb         | 137F5     | 4695        | AB_390779   | 1:1,000  | -       |
| pERK1/2 (Y202/Y204) | CST                     | Rabbit mAb         | D13.14.4E | 4370        | AB_2315112  | 1:2,000  | -       |
| Akt                 | CST                     | Rabbit mAb         | C67E7     | 4691        | AB_915783   | 1:1,000  | -       |
| pAkt (S473)         | CST                     | Rabbit mAb         | D9E       | 4060        | AB_2315049  | 1:2,000  | -       |
| $\beta$ -actin      | Novus Biologicals       | Mouse mAb          | ac-15     | NB600-501   | AB_10077656 | 1:10000  | -       |
| Mouse IgG           | Tokyo Chemical Industry | Goat pAb-HRP       | -         | G0407       | AB_2857910  | 1:3000   | -       |

CST, Cell Signalling Technology; mAb, monoclonal antibody; pAb, polyclonal antibody; HRP, horseradish peroxidase

Table S6. Research resource identifier for statistical tool and software used in this study.

| Name                          | RRID       |
|-------------------------------|------------|
| bcl2fastq                     | SCR_015058 |
| Trimmomatic                   | SCR_011848 |
| Bowtie 2                      | SCR_005476 |
| Genotype Analysis Toolkit     | SCR_001876 |
| SnpEff                        | SCR_005191 |
| Polyphen-2                    | SCR_013189 |
| SIFT                          | SCR_012813 |
| PROVEAN                       | SCR_002182 |
| DAVID Bioinformatics Resource | SCR_001881 |
| EdgeR                         | SCR_012802 |
| Java TreeView                 | SCR_016916 |
| Ingenuity Pathway Analysis    | SCR_008653 |
| Primer3                       | SCR_003139 |
| ImageJ                        | SCR_003070 |
| Prism                         | SCR_002798 |

Table S7. Primers used for validation of the results of whole exome sequeneeces by Sanger sequencing.

| Dog   | Gene           | Forward primer (5'-)   | Reverse primer (5'-)   |
|-------|----------------|------------------------|------------------------|
| Dog 1 | <i>CCDC136</i> | CACTGTGAGGACATGGTTGC   | AGGCAGTGGGCTTCTCAAG    |
|       | <i>TP53</i>    | ACCCCCACCCAATACCTG     | GCCTTGTCCTATCTGTAG     |
| Dog 2 | <i>BBX</i>     | AGAAGGAGAAAAGGCTGGAA   | GGATGCAAGTTATGCCCCACT  |
|       | <i>N4BP2</i>   | GGAAACTCAGAGCAGGCAGA   | TCTTCAGTGCTTGGAATCTCA  |
|       | <i>PDGFRB</i>  | AGCCAGAAACGTGCTCATCT   | TCTCCCATGTGTCACAGTCA   |
| Dog 3 | <i>ATRX</i>    | TCTTCCTGCGCATGTAAATCA  | TGCATGTATGTTTGGCACTCC  |
|       | <i>GARNL3</i>  | GTCTCGGCCCTAGGATTTTC   | GACTGGGGTAAGGTCCTGTG   |
|       | <i>HTR2C</i>   | GATATTTGTGCCCCGTCTGG   | TGTTACCAGTCGACGTCTGT   |
|       | <i>NR3C2</i>   | GTGCAGGGAAGCTCATGTC    | TTTCAGGGTCTCCTGCAACT   |
|       | <i>NRXN3</i>   | TGCTCAACTACGGCTACGTG   | ACCCCTCTCACAGGTCCTTC   |
|       | <i>SH3KBP1</i> | CAGAGAGAGAGCCAAACTGG   | CCGGAGTCTTCAGACAGCTT   |
|       | <i>TP53</i>    | GCCCTGGTATAATGTTGCTGG  | TCAGTGCTGGTTTGTCTCC    |
| Dog 4 | <i>NAV3</i>    | AAAGGGCCTCAACCATCTTC   | GCGTTGACCAGCTTGAATTT   |
|       | <i>PTPN11</i>  | GGCAGTGTAGCCCTTGAAAC   | CCTGCTCTTCCTCAATCCTG   |
|       | <i>ZMYM3</i>   | CTGTTTCAGCTGAGCCATCC   | AATGCGCACAGGTCATCTTG   |
| Dog 5 | <i>AKAP4</i>   | CCAGGACAAACAAAGCAGCT   | CTTGACTACACCTGGAGCCA   |
|       | <i>ASMT</i>    | ATGTGTTTGTGTTGCAGCCA   | GAGGTCACCAGCCCTGAG     |
|       | <i>C7</i>      | GCCCCAGTCATGAAGGAGAT   | GGTGTAATTTTCGGCCCTGAC  |
|       | <i>CLCA4</i>   | CCACCCTACCCTTCACCTCT   | GGTTGTTTCTTTCCTTGCTGC  |
|       | <i>COL11A1</i> | CCCTGGTTAGGCAGCTTTTA   | GGCTACTTGGCTTGACATCC   |
|       | <i>FBN1</i>    | AGCCTGAGATTCGAGTCACT   | CCACTGGCTTCTTCTTGGTG   |
|       | <i>FRAS1</i>   | GCCAACATTTCCATATGCCCA  | CCAGGGAAGAGTCAAGAAGAGA |
|       | <i>FREM2</i>   | CCAATTTCTACTCGCGGTC    | CGAATGCCCTCTTGTCCAAC   |
|       | <i>GGNBP2</i>  | GGGACTGGGATGTGCAAATC   | GTCTGCTTCTCCTCCCTCTG   |
|       | <i>LAMA1</i>   | AACTGCTTGAGCAGCCAGAC   | GTGTGTCCGTGGAAGTTGTG   |
|       | <i>MLEC</i>    | TTCTGGGCGTGTTACTAGCA   | GCATTGCCTTCTGTACCAA    |
|       | <i>MTX2</i>    | TTTGCTCTAGATCACTCATGCT | AACCACTTCGCGTCAGAAAA   |
|       | <i>NUGGC</i>   | GAGCCAATTCCAGCACCTTG   | TGCAGGGCCAAATACTACGA   |
|       | <i>OPCML</i>   | TGCACAGTGTTAATGGCCAC   | TCCATGTCACAGTTGGCTCT   |
|       | <i>PDGFD</i>   | TTGAAGGGCAGATGAGATCC   | TGGTTCCACAGCCACAGTTA   |
|       | <i>PTPN11</i>  | TGGCTCCTTGGGTATGTTTC   | CCTATGGCATGGAAGAGGTG   |
|       | <i>RELN</i>    | GGGGAGCAAGTCTGTCTGA    | TTGCAACTCGCATCAATCTC   |
|       | <i>RIPK1</i>   | GGGCTTCACTGAACCTCAGA   | GAGGAGAATACCCCATGCTG   |
|       | <i>SLC6A13</i> | TCACAAGTGGATGCCCTTCT   | CCCAAGGCCTGAATCCATTG   |
|       | <i>SMARCA1</i> | GAGCAAAGCCATGGGAAGAG   | ATCTCAAGCCCCAGACTCAC   |

Table S8. Primers used in qPCR in this study.

| Gene          | Forward primer (5'-)   | Reverse primer (5'-)  | Amplicon size (bp) | PCR efficiency (%) | R <sup>2</sup> |
|---------------|------------------------|-----------------------|--------------------|--------------------|----------------|
| <i>ERBB1</i>  | ACTGACCTCCATGCTTTCGA   | GTTATGTTTCAGGCCGACGAC | 95                 | 97.8               | 1.000          |
| <i>ERBB2</i>  | CCTGCCTTCACTTCAACCAC   | GCATGGATTCTGAAGGTGTCC | 87                 | 106.9              | 0.999          |
| <i>ERBB3</i>  | CTAGGCCCCAGTTCTCTCGAG  | AGTCCTCATCTGGGGTTGTG  | 144                | 98                 | 0.990          |
| <i>ERBB4</i>  | CAGCACGATTCCAGAAGCTC   | CTTGCGTAGGGTGCCATTAC  | 85                 | 101.3              | 0.994          |
| <i>FGFR1</i>  | TTGACCGGATCTACACCCAC   | GCTTGTCATTCGATGACCC   | 147                | 95.7               | 1.000          |
| <i>FGFR2</i>  | CCACAACCAAGAAGCCAGAC   | ACTGTTACCTGTCTCCGCAA  | 85                 | 102.6              | 0.997          |
| <i>FGFR3</i>  | ATCAGTGAGAGTGTGGAGGC   | TCTCAGCCACGCCTATGAAA  | 109                | 103.8              | 0.996          |
| <i>FGFR4</i>  | CTGACCTTCGGACCCTACTC   | AGGAGGTCATGGCAGAAGAC  | 86                 | 105.3              | 0.995          |
| <i>FLT3</i>   | TCACAGGACATGGACGAAA    | GAGCCCTGAGATGTGATCCA  | 136                | 109.2              | 0.994          |
| <i>KIT</i>    | TGGGAAAACCTTTGGGTGCTG  | AGGGCTTCTCGTTCGGTTAA  | 138                | 106.9              | 0.997          |
| <i>NTRK1</i>  | GACGGAGCTCTACATCGACA   | AGCCGAGGAGTGAAATGGAA  | 147                | 104.3              | 0.998          |
| <i>NTRK2</i>  | CTTTGTGCACCGAGATCTGG   | CCACCGACCCTGTAGTAGTC  | 120                | 93.9               | 0.998          |
| <i>NTRK3</i>  | GATCACCTCTGCCCCGATGTA  | GATGGCATGTACGTTGGTCC  | 95                 | 95.6               | 0.999          |
| <i>PDGFRA</i> | TTCACCTATCAAGTTGCGCG   | CACGATTTCCCTTGTGCCA   | 105                | 101.8              | 1.000          |
| <i>PDGFRB</i> | ACTGTGTCCACCGAGATCTG   | CATCCACTTCAGAGGCAGGA  | 149                | 94.4               | 0.999          |
| <i>RET</i>    | CAGTGTTGGAAGCAGGAACC   | GCCATCGTCATAAAGCAGGG  | 141                | 104.7              | 0.995          |
| <i>VEGFR1</i> | AATGGACGAGGACTTCTGCA   | GCCAGCAGTCCAACATGATC  | 101                | 98.1               | 0.999          |
| <i>VEGFR2</i> | GTGCTTCTCCGTATCCTGGA   | TGGGTCTCTGATTGGGTTC   | 150                | 100.7              | 0.999          |
| <i>VEGFR3</i> | TGTGTGTGAGGCCAACAATG   | CCATTTCGACGCTGATGAAGG | 88                 | 99.5               | 0.999          |
| <i>RPL32</i>  | TGGTTACAGGAGCAACAAGAAA | GCACATCAGCAGCACTTCA   | 100                | 95.7               | 0.990          |



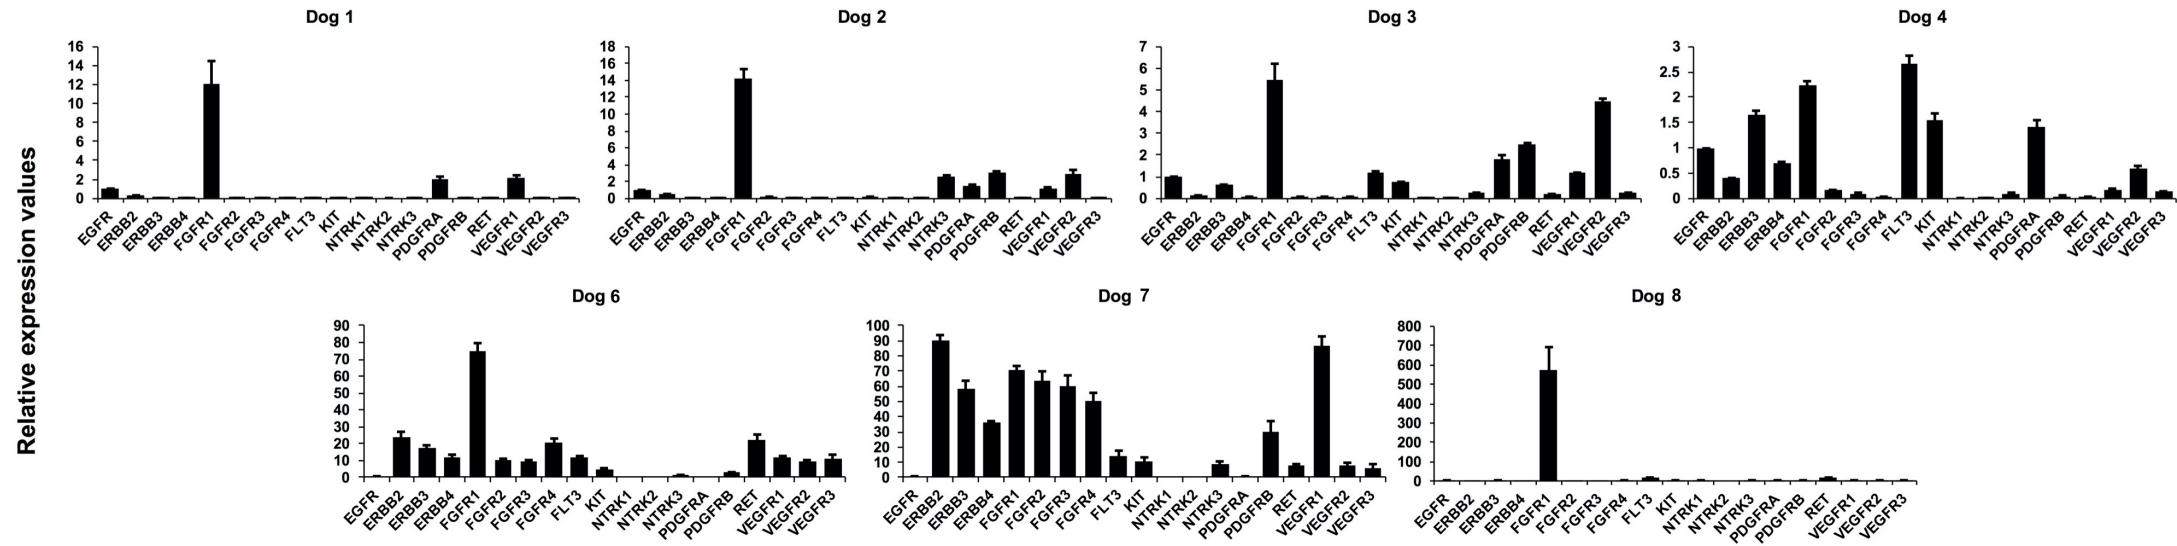

Fig. S1: Comparison of mRNA expressions among receptor tyrosine kinase (RTK) genes in seven canine histiocytic sarcoma cases. *FGFR1* mRNA expression was the highest among RTK genes in five of the seven cases. *RPL32* was used as an internal control gene. Each experiment was conducted in triplicate.

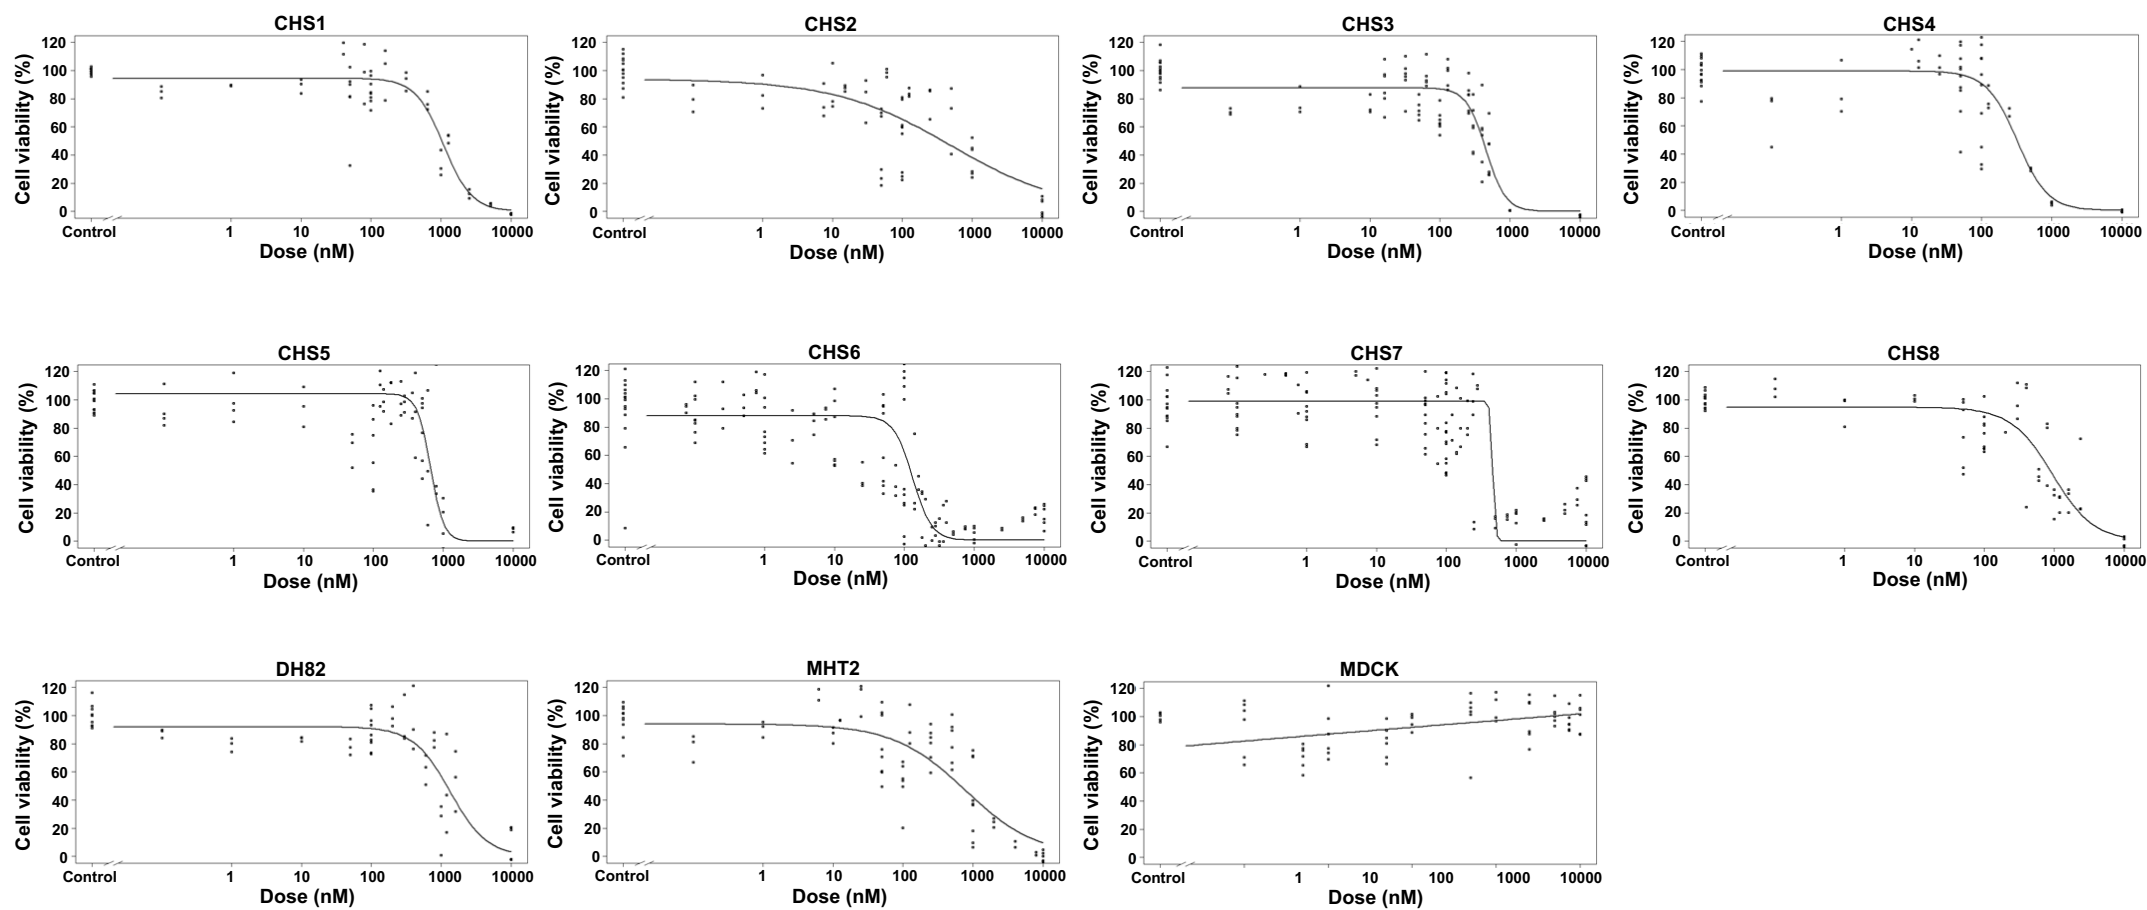

Fig. S2: Cell viability assays against ponatinib using 10 canine histiocytic sarcoma cell lines, CHS1, CHS2, CHS3, CHS4, CHS5, CHS6, CHS7, CHS8, DH82, MHT2, and non-HS cell, MDCK.

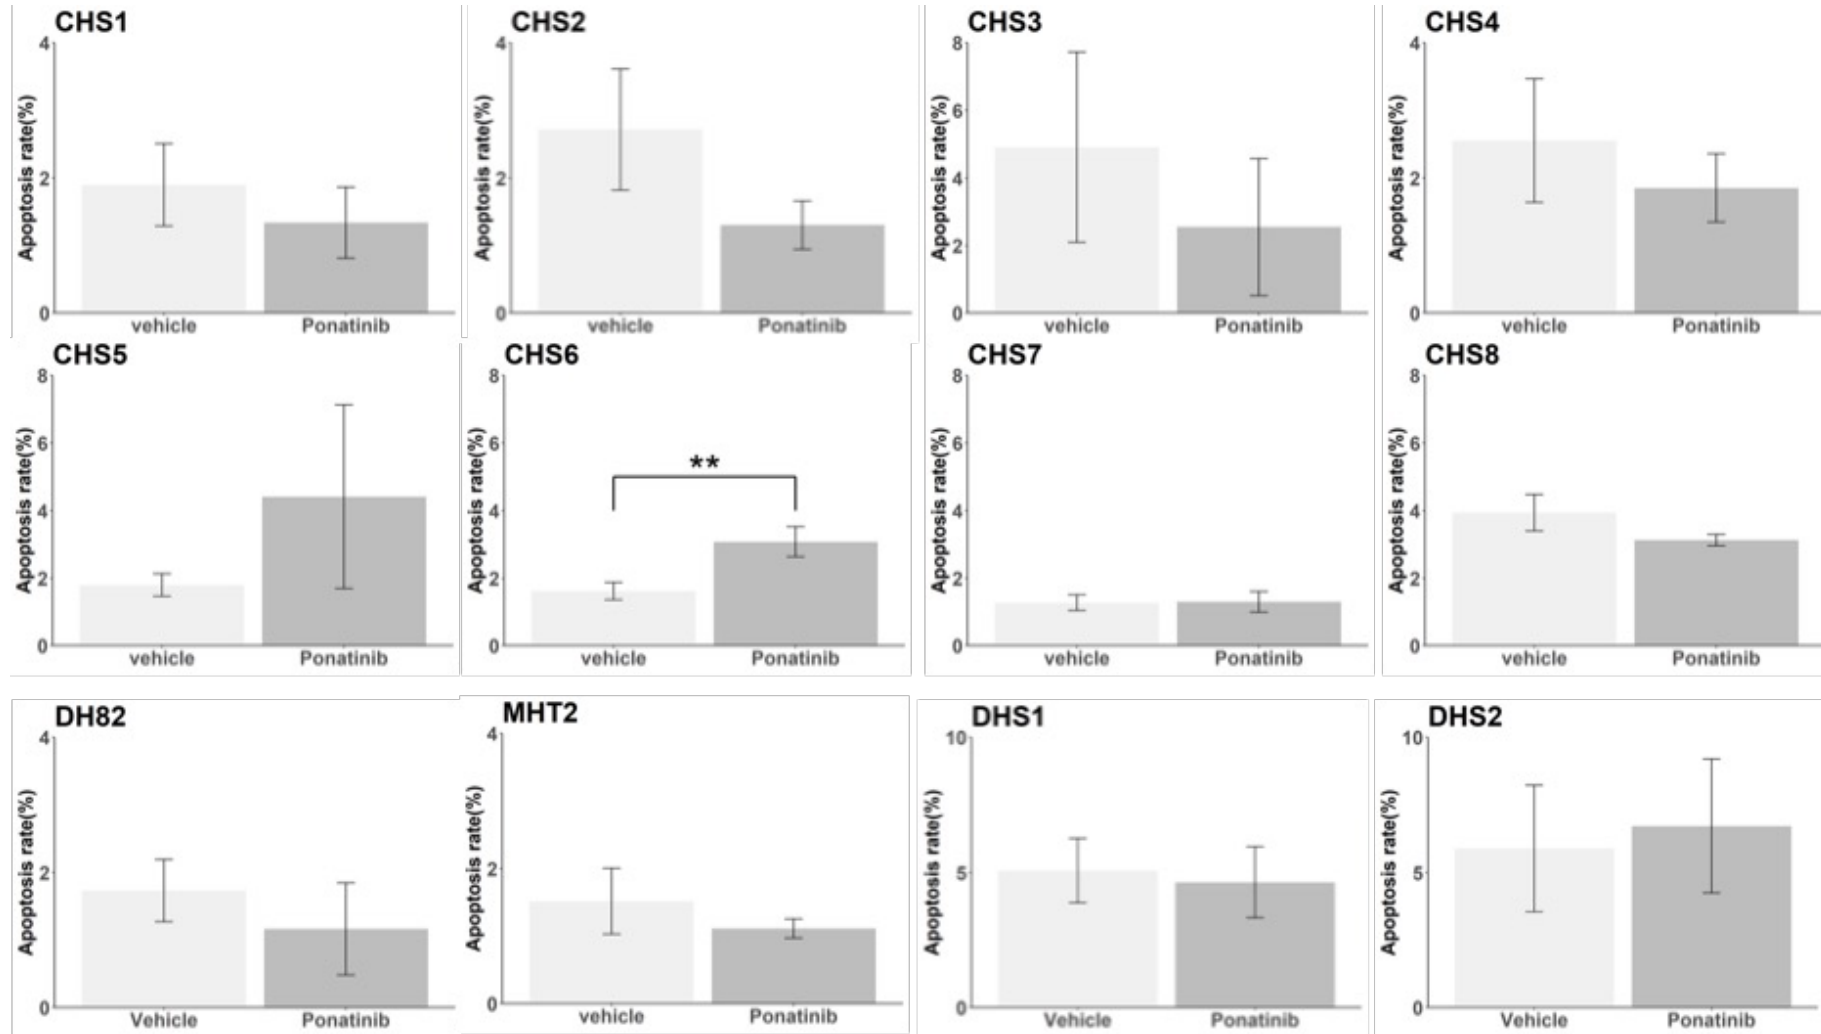

Fig. S3: Comparisons of the rates of cells showing apoptosis using unpaired t test in 12 canine histiocytic sarcoma cell lines, CHS1, CHS2, CHS3, CHS4, CHS5, CHS6, CHS7, CHS8, DH82, MHT2, DHS1, and DHS2. \*\* $P < 0.01$ .

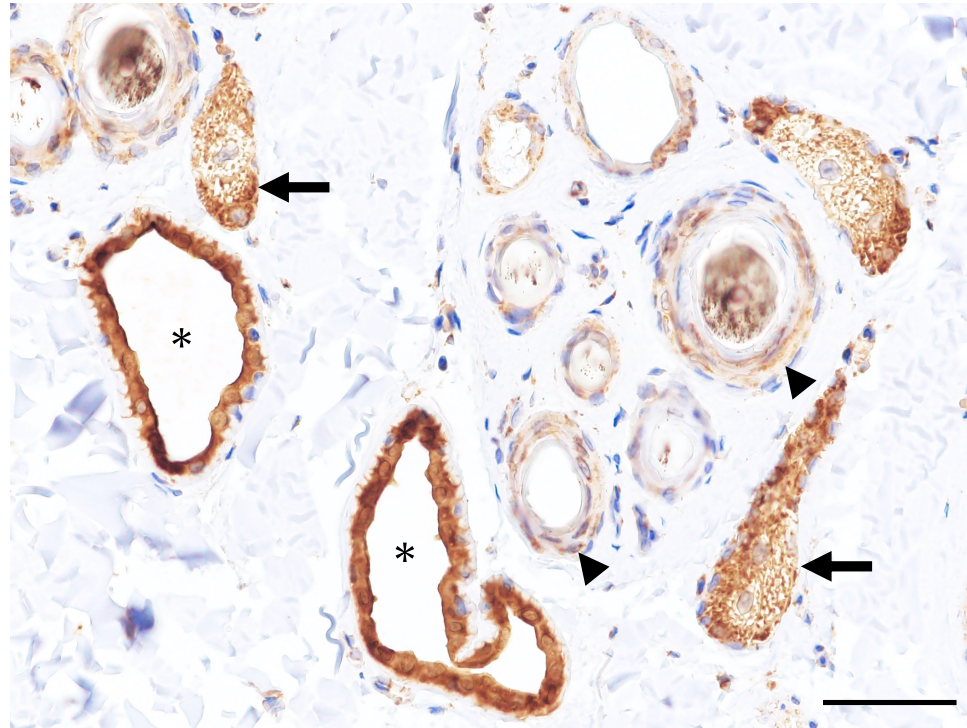

Fig. S4: Representative results of positive control for immunohistochemistry against FGFR1 using normal skin tissue of Dog 3. Epithelial cells of the hair follicles (arrowheads), sweat glands (\*), and sebaceous glands (arrows) are positively immunolabeled with anti-FGFR1 antibody as expected. Bar, 50µm.

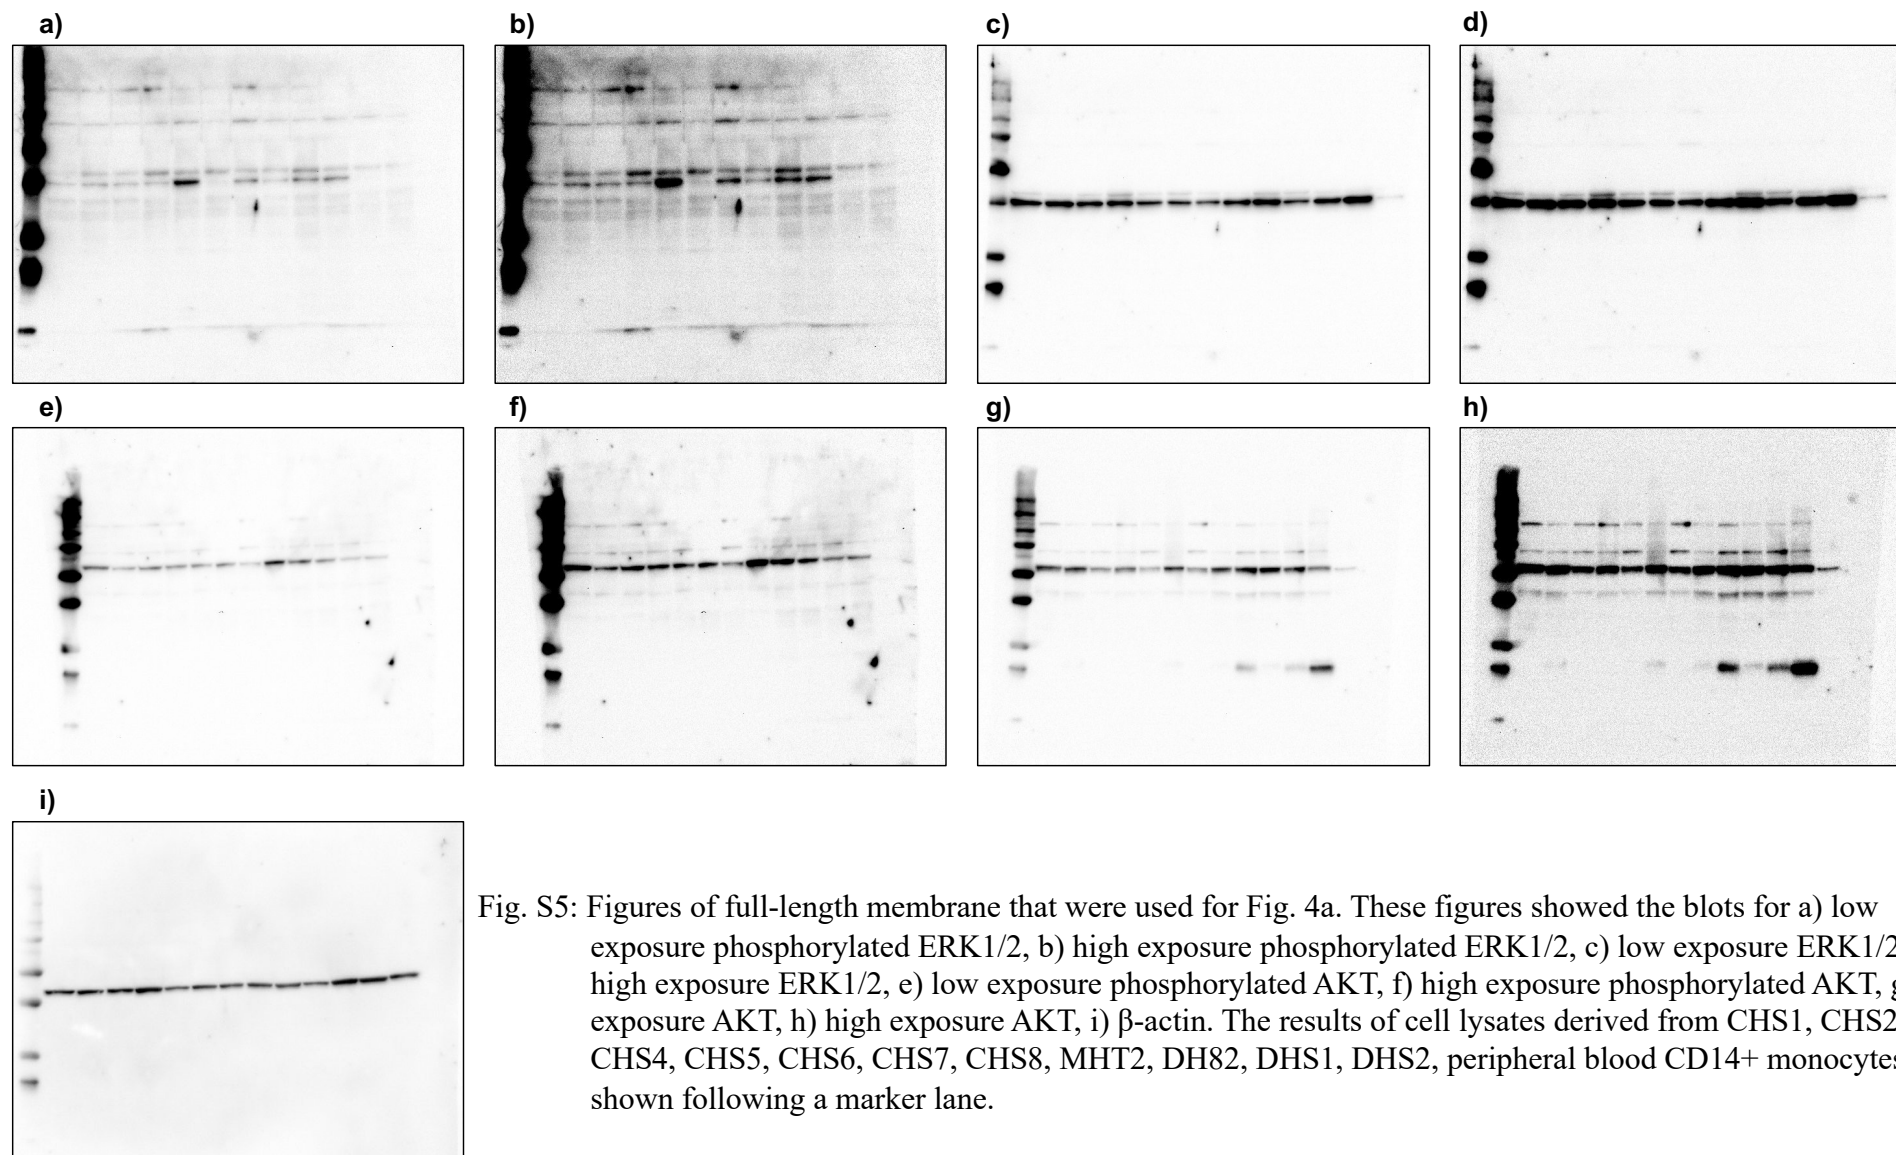

Fig. S5: Figures of full-length membrane that were used for Fig. 4a. These figures showed the blots for a) low exposure phosphorylated ERK1/2, b) high exposure phosphorylated ERK1/2, c) low exposure ERK1/2, d) high exposure ERK1/2, e) low exposure phosphorylated AKT, f) high exposure phosphorylated AKT, g) low exposure AKT, h) high exposure AKT, i)  $\beta$ -actin. The results of cell lysates derived from CHS1, CHS2, CHS3, CHS4, CHS5, CHS6, CHS7, CHS8, MHT2, DH82, DHS1, DHS2, peripheral blood CD14<sup>+</sup> monocytes were shown following a marker lane.

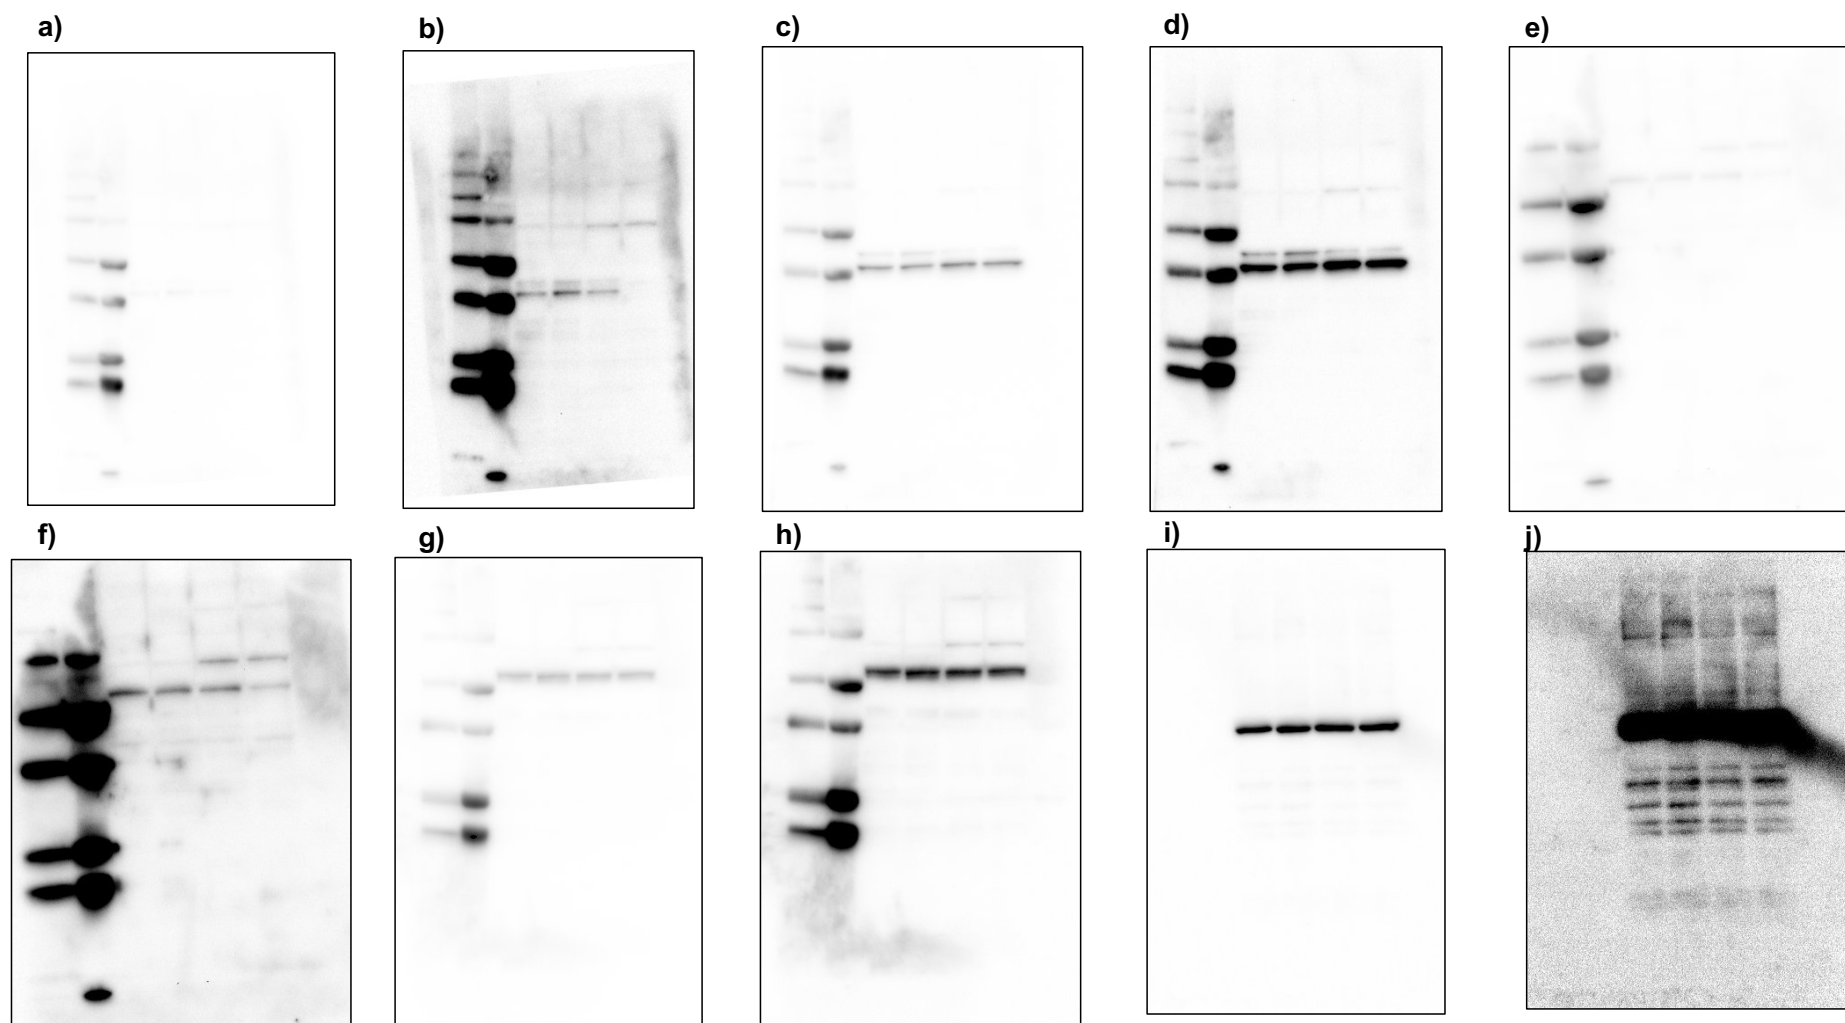

Fig. S6: Figures of full-length membrane that were used for Fig. 5b. These figures showed the blots for a) low exposure phosphorylated ERK1/2, b) high exposure phosphorylated ERK1/2, c) low exposure ERK, d) high exposure ERK, e) low exposure phosphorylated Akt, f) high exposure phosphorylated Akt, g) low exposure Akt, h) high exposure Akt, i) low exposure  $\beta$ -actin, and j) high exposure  $\beta$ -actin. In a)-h), the results of cell lysates derived from not-treated DHS1, ponatinib-treated DHS1, no-treated DHS2, ponatinib-treated DHS2 were shown following two marker lanes. Marker lanes were not included for  $\beta$ -actin I, j).
